# Supplementary material
Source: PubMed Central journal article supplement (PMC6689078)

## Three-Hour Bundle Compliance and Outcomes in Patients With Undiagnosed Severe Sepsis

*Amanda S. Deis, BS, MSCR; Bristol B. Whiles, MD; Alexandra R. Brown, MS; Catherine L. Satterwhite, PhD, MSPH, MPH; and Steven Q. Simpson, MD*

CHEST 2018; 153(1):39-45

*Online supplements are not copyedited prior to posting and the author(s) take full responsibility for the accuracy of all data.*

© 2017 AMERICAN COLLEGE OF CHEST PHYSICIANS. Reproduction of this article is prohibited without written permission from the American College of Chest Physicians. See online for more details. DOI: 10.1016/j.chest.2017.09.031

**e-Table 1: Infection ICD-9 diagnosis codes**

To define severe sepsis criteria, we followed a modified Angus method requiring a diagnosed infection +  $\geq 2$  sites of acute organ dysfunction. The ICD-9 diagnosis codes for infection listed below are based on definitions set forth by the American College of CHEST Physicians/Society of Critical Care Medicine Consensus definitions.

| ICD9 Codes                     | ICD-9 Code Description                                                                |
|--------------------------------|---------------------------------------------------------------------------------------|
| 001.0 - 139.99                 | Infectious & parasitic Infections                                                     |
| 320.0 - 326.99                 | Meningitis, encephalitis, abscess, phlebitis and thrombophlebitis                     |
| 038.0 - 038.9                  | Septicemia*                                                                           |
| 420.0 - 421.9                  | Acute pericarditis and endocarditis                                                   |
| 451.0 - 451.9                  | Phlebitis and thrombophlebitis                                                        |
| 461.0 - 465.9                  | Sinusitis, pharyngitis, tonsillitis, URI's, laryngitis, bronchitis, and bronchiolitis |
| 481 - 482.9 485 - 486          | Pneumonia and bronchopneumonia                                                        |
| 491.21                         | Obstructive chronic bronchitis with (acute) exacerbation                              |
| 494.0 - 494.1                  | Bronchiectasis                                                                        |
| 510 - 510.9                    | Empyema                                                                               |
| 513 - 513.1                    | Abscess of lung or mediastinum                                                        |
| 540.0, 540.1, 540.9 - 542, 566 | Appendicitis                                                                          |
| 562.01-562.11                  | Diverticulitis of small intestine (without hemorrhage)                                |
| 562.13                         | Changes in vascular appearance of retina                                              |
| 567.0 - 567.9                  | Peritonitis                                                                           |
| 569.5 - 569.83                 | Abscess or perforation of intestine                                                   |
| 572.0 - 572.1                  | Abscess of liver                                                                      |
| 575                            | Cholecystitis                                                                         |
| 590.0 - 590.9                  | Chronic pyelonephritis                                                                |
| 599                            | UTI/Urethral infection                                                                |
| 601 - 601.9                    | Prostatitis                                                                           |
| 614                            | Acute salpingitis and oophoritis                                                      |
| 616.9                          | Unspecified inflammatory disease of cervix vagina and vulva                           |
| 670.00- 670.04                 | Major puerperal infection                                                             |
| 681 - 681.9                    | Cellulitis, abscess, onychia, and paronychia of digits                                |
| 686 - 686.1                    | Pyoderma                                                                              |
| 686.8 - 686.9                  | Other local infections, skin & subcutaneous                                           |
| 711.00- 711.99                 | Arthritis                                                                             |
| 730.00 -730.99                 | Osteomyelitis                                                                         |
| 790.7                          | Bacteremia                                                                            |
| 996.6 - 996.69                 | Infection and inflammatory reaction due to device implant and graft                   |
| 998.51                         | Infected post-operative seroma                                                        |
| 998.59                         | Acute reaction to foreign substance accidentally left during a procedure              |
| 999.3                          | Infection due to central venous catheter                                              |

\*According to ICD-9: "Septicemia, assigned code 038.x, is a systemic disease associated with the presence and persistence of pathogenic microorganisms or their toxins in the blood, which can include bacteria, viruses, fungi or other organisms. Effective with discharges of December 15, 2003, per Coding Clinic, fourth quarter 2003, septicemia no longer equates with sepsis."

**e-Table 2: Criteria for Acute Organ Dysfunctions**

To define severe sepsis, we followed a modified Angus method requiring a diagnosed infection +  $\geq 2$  sites of acute organ dysfunction. The ICD-9 diagnosis codes for acute organ dysfunction, as well as acute dysfunction identified by abnormal first laboratory data (listed below) are based on definitions set forth by the American College of CHEST Physicians/Society of Critical Care Medicine Consensus definitions.

| <b>Organ System*</b> | <b>Physiological/Lab Markers</b>                                | <b>Threshold Value</b>                               | <b>ICD-9 Description &amp; Code</b>                                                                                                                                   |
|----------------------|-----------------------------------------------------------------|------------------------------------------------------|-----------------------------------------------------------------------------------------------------------------------------------------------------------------------|
| Neurological         | Glasgow Coma Scale                                              | < 15                                                 | Encephalopathy Unspecified 384.30<br>Metabolic Encephalopathy, 348.31<br>Other Encephalopathy 348.30<br>Transient Mental Disorder 293.9<br>Anoxic Brain Damage, 348.1 |
| Hematological        | Partial Thromboplastin Time<br>Platelet Count<br>INR<br>D-dimer | > 60 sec<br><br>< 100,000/ $\mu$ L<br>> 1.5<br>> 230 | Defibrination Syndrome, 286.6<br>Thrombocytopenia, 287.5<br>Secondary Thrombocytopenia, 287.4<br>Other and unspecified coagulation defects, 286.9                     |
| Respiratory          | Arterial O <sub>2</sub> saturation<br>PaO <sub>2</sub>          | < 90%<br>< 70%                                       | Acute respiratory failure 518.81                                                                                                                                      |
| Cardiovascular       | Systolic Blood pressure<br>MAP<br>Received a vasopressor**      | < 90 mmHg<br>< 65 mmHg                               | Hypotension 458.0<br>Shock w/o trauma 785.5<br>Septic Shock 785.52<br>Other shock, no trauma 785.59                                                                   |
| Hepatic              | Bilirubin, total<br>ALT<br>AST                                  | > 2 mg/dL<br>> 90 U/L<br>> 90 U/L                    | Acute and subacute necrosis of the liver, 570<br>Hepatic infarction 573.4                                                                                             |
| Renal                | Creatinine                                                      | >2 mg/dL                                             | Oliguria and anuria, 788.5<br>Acute Kidney Failure, 584                                                                                                               |
| Lactic acidosis      | Lactate                                                         | >2mmol/L                                             |                                                                                                                                                                       |

\*Required 2 or more different organ systems be compromised, from any combination of the 7 systems listed, plus one ICD-9 infection code to meet criteria for severe sepsis. All lab values were sorted by first measurement date and only included as an acute organ dysfunction if it met threshold.

\*\*Vasopressor types for cardiovascular dysfunction included dobutamine, dopamine, norepinephrine, epinephrine, vasopressin, or phenylephrine.

**e-Table 3: Surviving Sepsis Campaign 3-hour treatment completion rates for patients with severe sepsis.**

| <b>Bundle Protocol Component</b>                     | <b>Overall Cohort</b> | <b>Patients with sepsis specific ICD-9 code 995.92</b> | <b>Patients without sepsis specific ICD-9 code 995.92</b> | <b>P value*</b> |
|------------------------------------------------------|-----------------------|--------------------------------------------------------|-----------------------------------------------------------|-----------------|
|                                                      | n=5631                | n=1847 (32.8%)                                         | n=3784 (67.2%)                                            |                 |
| All 4 components                                     | 491 (8.72%)           | 189 (10.2%)                                            | 302 (7.98%)                                               | p<0.005         |
| Therapeutic Components*                              | 1764 (31.3%)          | 665 (36.0%)                                            | 1099 (29.0%)                                              | p<0.001         |
| Blood culture                                        | 3483 (61.9%)          | 1411 (76.3%)                                           | 2072 (54.8%)                                              | p<0.001         |
| Lactate measured within 3 hours                      | 1589 (28.2%)          | 541 (29.3%)                                            | 1048 (27.7%)                                              | p=0.23          |
| Broad spectrum given under three hours               | 2087 (37.1%)          | 801 (43.4%)                                            | 1286 (34.0%)                                              | p<0.001         |
| Antimicrobial given under three hours                | 2593 (46.1%)          | 1010 (54.7%)                                           | 1583 (41.8%)                                              | p<0.001         |
| First antimicrobial given was broad spectrum         | 4271 (75.8%)          | 1402 (75.9%)                                           | 2869 (75.8%)                                              | p=0.97          |
| Time to antimicrobial (mean hours ± SD)              | 3.70 ± 1.96           | 3.27 ± 1.87                                            | 3.91 ± 1.96                                               | p<0.001         |
| Appropriate Fluids *                                 | 4825 (85.7%)          | 1549 (83.9%)                                           | 3276 (86.6%)                                              | p<0.001         |
| Patients with a need for fluids*                     | 928 (16.5%)           | 371 (20.1%)                                            | 557 (14.8%)                                               | p<0.001         |
| Fluids given at 30mL/Kg among those only with a need | 133(14.3%)            | 74 (19.6%)                                             | 59 (10.6%)                                                | p<0.001         |

\*All p values less than 0.001 were rounded and reported p<0.001.

\*Therapeutic components were defined as receiving both a broad spectrum antibiotic and appropriate IV fluid within 3 hours of triage. Appropriate fluid was defined as crystalloid IV fluids given at a rate of 30mL/kg, within 2.5 hours of triage if the patient was hypotensive or had a lactate >4, or appropriately not given if the patient had no need for fluids based on MAP and lactate values. Following the SCCM definitions, a need for fluids was met if the first MAP was < 70mmHg or the first serum lactate ≥ 4 mmol/L.

**e-Table 4: Multivariate logistic regression model of adjusted odds ratios for receiving therapeutic components of the bundle protocol.**

Overall model choice was based on using Hosmer and Lemeshow Goodness-of-Fit Test where a higher p value indicates significance, (Chi-squared value, 8.24, p=0.410).

| <b>Predictors of receiving therapeutic components of treatment in final model</b> | <b>Adjusted Odds Ratios</b> | <b>95% Confidence Interval</b> |
|-----------------------------------------------------------------------------------|-----------------------------|--------------------------------|
| Age                                                                               | 1.01                        | 1.00-1.01                      |
| Sepsis specific ICD-9 diagnosis code 995.52                                       | 1.22                        | 1.10 – 1.36                    |
| Respiratory Infections                                                            | 1.60                        | 1.42 – 1.78                    |
| Respiratory Dysfunction                                                           | 1.25                        | 1.12 – 1.40                    |

**e-Table 5: Multivariate logistic regression model of adjusted odds ratios for 30-day mortality.**

Overall model choice was based on using Hosmer and Lemeshow Goodness-of-Fit Test where a higher p value indicates significance, (Chi-squared value, 7.14, p=0.41).

| <b>Predictors of Mortality</b>                           | <b>Adjusted Odds Ratios</b> | <b>95% Confidence Interval</b> |
|----------------------------------------------------------|-----------------------------|--------------------------------|
| Organ Dysfunction Score                                  | 1.85                        | 1.66-2.08                      |
| Presence of Sepsis specific ICD-9 diagnosis code 995.52  | 2.53                        | 1.89-3.39                      |
| 3-Hour Bundle Completed                                  | 0.42                        | 0.22-0.80                      |
| Broad Spectrum antibiotic given within 3 hours of triage | 1.39                        | 1.03-1.86                      |

**e-Figure 1: Treatment completion rates for ICD-9 (+) and ICD-9 (-) patients when controlling for the presence of a respiratory infection, n=2516.**

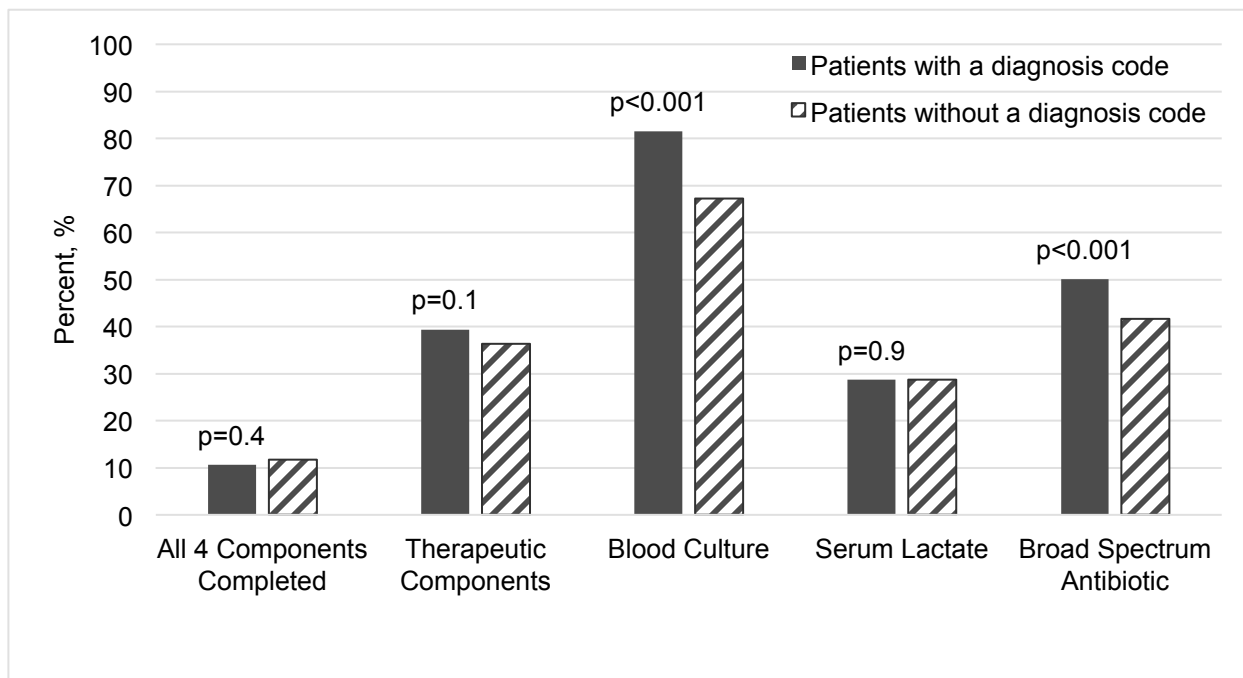

Supplement: mmc1.pdf [file mmc1.pdf]
